# Supplementary material
Source: HighWire-hosted journal article supplement (https://er.uwpress.org/content/suppl/2023/12/07/41.4.220)
Supplement: ERv41n04_Langill_SupplementA.pdf [file ERv41n04_Langill_SupplementA.pdf]

## Profil communautaire

### But

1. Fournir des informations de bases sur la communauté ; et
2. Acquérir une compréhension de l'évolution des tendances migratoires dans la communauté.

### Sélection des participants

Il est recommandé que les équipes de terrain rencontrent au moins deux informateurs clés pour compléter le profil. Cependant, un seul profil de communauté doit être complété pour chaque cas. L'équipe peut choisir de rencontrer un groupe d'informateurs clés en une seule session.

L'informateur (homme et/ou femme) pourrait être un leader de la communauté, fonctionnaire, homme politique, un employeur local, un chef d'entreprise, enseignant, agent de la santé. Les considérations pertinentes sont des informateurs qui sont les plus susceptibles de connaître les informations demandées, incluant des informations sur la situation des membres les plus marginaux de la communauté et les différents groupes sociaux, et pouvant fournir des informations d'une manière impartiale. Des entretiens de suivi avec des informateurs supplémentaires ou peut-être un membre du groupe de discussion en dehors du groupe de discussion devraient être menées au besoin pour remplir le questionnaire, y compris barrer ou compléter les réponses qui peuvent être partielles ou déroutant.

### Profil de la communauté

Nom du village \_\_\_\_\_

Commune // district \_\_\_\_\_

Province \_\_\_\_\_

Nom de l'enquêteur \_\_\_\_\_

Date(s) de l'interview \_\_\_\_\_

| Noms des répondants | sexe | Rôle dans la communauté |
|---------------------|------|-------------------------|
|                     |      |                         |
|                     |      |                         |
|                     |      |                         |
|                     |      |                         |

[Lire:] Merci d'avoir accepté d'être interviewé aujourd'hui. Nous allons discuter de différentes caractéristiques sociales, économiques et politiques du village au cours de la prochaine heure. Cette information servira de base utile pour une étude menée sur l'impact de la migration sur l'agriculture familiale et les communautés rurales.

Votre participation est volontaire aujourd'hui. En tant que membre important de votre communauté, nous espérons que vous serez à l'aise de vous exprimer librement. Si vous ne voulez pas que votre nom s'identifie aux informations ou opinions que vous partagerez, nous traiterons toutes vos informations avec confidentialité. Vous êtes libre de ne pas répondre aux questions, ou de vous retirer de la participation à l'entretien à tout moment. Cependant, nous espérons vivement vous aider avec ce profil de la communauté que vos connaissances et points de vue sont très importants pour nous.

Avez-vous des questions avant de commencer?

1. SVP, parlez-nous de votre village. Quels sont deux ou trois choses importantes à savoir sur l'histoire et les personnes qui vivent ici ?

---

---

---

---

---

2. Combien de personnes vivent actuellement dans ce village ? \_\_\_\_\_
3. Et il y a dix ans, combien de personnes vivaient dans le village ? \_\_\_\_\_

4. Depuis quand votre village est-il établi?

5. Quels groupes (ethnies, groupes religieux, etc.) résident dans votre communauté?

---

6. Est-ce que votre village a reçu un grand nombre d'arrivants (migrants) depuis les 15-20 dernières années ? Provenance de ces migrants? SVP expliquer.

---

7. Ces migrants ont-ils les mêmes droits d'accès à la terre que les autochtones ? SVP expliquer.

---

8. Est-ce que les différents groupes qui vivent au village s'entendent bien ? Y-a-t-il des conflits ?

9. Quelles sont les activités principales des hommes dans votre village ?

- a) Pendant l'hivernage : \_\_\_\_\_
- b) Pendant la saison sèche : \_\_\_\_\_

10. Et des femmes ?

- a. Pendant l'hivernage : \_\_\_\_\_
- b. Pendant la saison sèche : \_\_\_\_\_

Et des jeunes ?

- a. Pendant l'hivernage : \_\_\_\_\_
- b. Pendant la saison sèche : \_\_\_\_\_

11. Quels sont les principaux produits agricoles (commerciaux et de subsistance) venant de la production ou transformation locale ?

12. Comparé aux dix ans passés, pensez- vous que ce village est plus prospère et que la plupart des personnes ont des niveaux plus élevés dans leur bien- être et revenus ? Ou que le village a le même niveau de prospérité ou est moins prospère qu'il y a dix ans ? \_\_\_\_\_

- 1. PLUS PROSPERE.....1**
- 2. MEME NIVEAU.....2**
- 3. MOINS PROSPERE.....3**

13. Au cours des dix dernières années passées ou plus, y-a-t-il eu des évènements qui ont beaucoup affectés le bien-être et les moyens de subsistance de la communauté ?

- a. Les évènements qui ont été favorables à la population (s'il vous plaît noter l'année) :

---

---

---

- b. Quels groupes de votre village ont été particulièrement affectés (e.g. hommes, femmes, jeunes hommes, jeunes femmes, autochtones, nouveaux arrivés, etc.)

- c. Les évènements qui ont été défavorables à la population [noter s'il vous plaît l'année] :

---

---

---

- a. Quels groupes de votre village ont été particulièrement affectés (e.g. hommes, femmes, jeunes hommes, jeunes femmes, nouveaux arrivés, etc.)

14. Dans les dix années passées, quels ont été les types des principales infrastructures de développement dans la communauté ? (Ceci pourrait être les routes, irrigations, la construction des usines de transformations agro-industrielles, le développement des bois et de la plantation, installation des stockages agricoles, des téléphones mobiles, internet et autres formes de connectivités).

---

---

15. Dans les dix dernières années, est-ce que des programmes de développement (menés par le gouvernement, des ONGs, etc.) ont eu un effet important dans votre village ? Si oui, lesquels et pour qui spécifiquement ? (Agriculteurs, éleveurs, agro-pasteurs, jeunes, femmes, personnes âgées, commerçants, etc)

16. Est-ce que votre communauté ou certains groupes dans votre village ont reçu des formations au cours des 10 dernières années ? Si oui, lesquelles et quels groupes y ont participé (e.g. hommes, femmes, jeunes hommes, jeunes femmes, etc.)

17. Pouvez-vous nous parler de l'évolution du paysage et de l'utilisation des terres au cours des dix dernières années ?

18. Votre village a-t'il accès à l'eau potable ?

- a. souffre-t-il de pénurie d'eau (eau de production que l'eau potable) pendant la saison sèche (SVP expliquer) ?

19. Est-il difficile de trouver assez de bois de chauffe dans votre village ? Est-ce que vous utilisez d'autres types d'énergie ?

20. Le marché local le plus proche où la plupart des personnes de cette communauté part acheter ou vendre les marchandises est-il à proximité? (Nombre approx. de km)

---

21. Maintenant j'aimerais aborder le sujet de migrations temporaires et permanentes de cette communauté. En disant migration temporaire, je me réfère aux résidents du village qui travaillent dans d'autres zones rurales ou urbaines, ou qui sont allés rendre visite aux parents pour travailler ou d'autres lieux de travail sur une parcelle. Ils pourraient travailler sur leur propre parcelle ou celle de leur famille, ou en pastoralisme, la chasse, assembler ou étendre les voyages de pêche, ou comme des travailleurs salariés dans les plantations, en construction, logements ou mines, par exemple.

i. Quel est à peu près le pourcentage des ménages où les hommes migrent temporairement ? \_\_\_\_\_

- i. Presqu'aucun.....1
- ii. ¼.....2
- iii. ½.....3
- iv. ¾.....4
- v. Presque tout.....5

22. Où vont ces migrants et pourquoi ?

23. Ont-ils tendance à être jeunes ou âgés ?

24. Combien de temps et à quel moment s'absentent-ils du village ?

---

---

25. Quel est à peu près le pourcentage des ménages où les hommes migrent permanemment (5 ans ou plus) ? \_\_\_\_\_

- i. Presqu'aucun.....1
- ii. ¼.....2
- iii. ½.....3
- iv. ¾.....4
- v. Presque tout.....5

26. Où vont ces migrants et pourquoi ?

27. Ont-ils tendance à être jeunes ou âgés ?

28. Sont-ils habituellement d'un groupe particulier du village (e.g. ethnie, groupe socio-économique, etc.) ? Si oui, lequel ?

29. Et quel est le pourcentage des ménages où les femmes migrent temporairement ? \_\_\_\_\_

- i. Presqu'aucun.....1
- ii. ¼.....2

iii. ½.....3

iv. ¾.....4

v. Presque tout.....5

30. Où vont ces migrantes et pourquoi ?

31. Ont-elles tendance à être jeunes ou âgées ?

32. Sont-elles habituellement d'un groupe particulier du village (e.g. ethnie, groupe socio-économique, etc.) ? Si oui, lequel ?

33. Combien de temps et à quel moment s'absentent-elles du village ?

---

---

34. Et quel est le pourcentage des ménages où les femmes migrent permanemment (5 ans et plus ; à l'exception du départ pour le mariage) ? \_\_\_\_\_

i. Presqu'aucun.....1

ii. ¼.....2

iii. ½.....3

iv. ¾.....4

v. Presque tout.....5

35. Comparé à dix ans de cela, est ce que le pourcentage des migrants temporaires a évolué, n'a pas changé ou a baissé ?

36. Hommes \_\_\_\_\_ Femmes \_\_\_\_\_

i. Evolué.....1

ii. Même niveau.....2

iii. Diminué.....3

37. Pourquoi ?

---

---

38. Quels facteurs affectent ces tendances migratoires (qu'est ce qui peut influencer les raisons de l'évolution des tendances de la migration)?

39. Quels types de ménages sont les plus souvent dirigés par des femmes dans la communauté ?  
[Par exemple, ceci pourrait être des femmes qui sont veuves, séparées, divorcées ou les femmes de migrants permanents, ...]

---

---

---

40. Quel pourcentage pourriez-vous estimer des ménages dirigés par les femmes dans le village ? \_\_\_\_\_

41. Quelle est la proportion de garçons qui partent à l'école dans cette communauté :

Ecole primaire : \_\_\_\_\_ Ecole secondaire : \_\_\_\_\_

1. Presqu'aucun.....1
2.  $\frac{1}{4}$ .....2
3.  $\frac{1}{2}$ .....3
4.  $\frac{3}{4}$ .....4
5. Presque tous.....5

42. Quelle est la proportion de filles qui partent à l'école dans cette communauté :

Ecole primaire : \_\_\_\_\_ Ecole secondaire \_\_\_\_\_

1. Presqu'aucune.....1
2.  $\frac{1}{4}$ .....2
3.  $\frac{1}{2}$ .....3
4.  $\frac{3}{4}$ .....4
5. Presque tous.....5

43. Y-a-t-il une école secondaire (CEG ou Lycée) dans votre village ? Si non, où est l'école secondaire la plus proche ?

44. Combien d'hommes ont des téléphones cellulaires dans ce village ? \_\_\_\_\_

1. Presqu'aucun.....1
2.  $\frac{1}{4}$ .....2
3.  $\frac{1}{2}$ .....3
4.  $\frac{3}{4}$ .....4
5. Presque tous.....5

45. Combien de femmes ont des téléphones cellulaires dans ce village ? \_\_\_\_\_

1. Presqu'aucun.....1
2.  $\frac{1}{4}$ .....2
3.  $\frac{1}{2}$ .....3
4.  $\frac{3}{4}$ .....4
5. Presque tous.....5

46. Combien d'hommes ont des bicyclettes \_\_\_\_\_ ou motocyclettes dans ce village ? \_\_\_\_\_

1. Presqu'aucun.....1
2.  $\frac{1}{4}$ .....2
3.  $\frac{1}{2}$ .....3
4.  $\frac{3}{4}$ .....4
5. Presque tous.....5

47. Combien de femmes ont des bicyclettes \_\_\_\_\_ ou motocyclettes dans ce village ? \_\_\_\_\_

1. Presqu'aucun.....1
2.  $\frac{1}{4}$ .....2
3.  $\frac{1}{2}$ .....3
4.  $\frac{3}{4}$ .....4
5. Presque tous.....5

*Merci d'avoir pris du temps pour répondre aux questions. Vos réponses sont très importantes pour nous.*
